# Supplementary material
Source: PubMed Central journal article supplement (PMC6932243)
Supplement: JB.00567-19-s0001.pdf [file JB.00567-19-s0001.pdf]

1 **Nucleoside diphosphate kinase escalates A to C mutations in MutT deficient strains of**  
2 *Escherichia coli*

3

4 **Running Title: Role of NDK in genome instability**

5

6 Indu Kapoor<sup>1</sup>, Elhassan Ali Fathi Emam<sup>1</sup>, Abhirup Shaw<sup>1</sup> and Umesh Varshney<sup>1,2\*</sup>

7 <sup>1</sup>Department of Microbiology and Cell Biology, Indian Institute of Science, Bangalore, 560012,  
8 India, and <sup>2</sup>Jawaharlal Nehru Centre for Advanced Scientific Research, Bangalore, 560064, India

9

10 \*Correspondence to: Umesh Varshney,

11 Phone: +918022932686, Fax: +918023602697,

12 E-mail: varshney@iisc.ac.in, [uvarshney@gmail.com](mailto:uvarshney@gmail.com)

13

14 Keywords: dNTP, 8-oxo-dGTP (8-O-dGTP), MutT, NDK, mutation rate and mutation  
15 frequency.

## 16 **Supplementary Methods**

### 17 **DNA oligomers**

18 Sequences of DNA oligomers are provided in Table S1.

### 19 **Generation of strains**

#### 20 ***E. coli* CC101 $\Delta mutT \Delta ndk$**

21 *E. coli* CC101  $\Delta mutT::kan$  strain was used as the parent to generate additional  $\Delta ndk::kan$  mutation.

22 The kanamycin marker cassette was excised (cured) from CC101  $\Delta mutT::kan$  strain using pCP20

23 plasmid. The plasmid harbors the gene sequence for FLP recombinase, which recognizes the FRT

24 sites present in the sequence flanking the marker cassette and removes the DNA region between

25 the FRT sites (1). The CC101  $\Delta mutT$  cured strain was selected by its sensitivity to kanamycin and

26 verified by colony PCR using the primers *Eco\_mutT\_Up* and *Eco\_mutT\_Dn*, flanking *mutT* locus.

27 To obtain CC101  $\Delta ndk::kan \Delta mutT$  strain, P1 phage lysate was raised on JW2502-1  $\Delta ndk::kan$

28 strain and used to transduce *E. coli* CC101  $\Delta mutT$  cured strain followed by plating on LB Kan

29 plate. Transductants were confirmed by colony PCR using the primers *Eco\_ndk\_KO\_Fp* and

30 *Eco\_ndk\_KO\_Rp*, flanking the *ndk* locus.

#### 31 ***E. coli* CC101 $\Delta mutT \Delta ribA$**

32 Using *E. coli* CC101  $\Delta mutT$  strain cured for the antibiotic marker as a parent, *ribA* locus was

33 disrupted by pKD46 mediated recombination (2). The linear fragment corresponding to  $\Delta ribA::cm$

34 was created by amplification of chloramphenicol cassette from pKD3 using *Eco\_ribA\_KO\_Fp* and

35 *Eco\_ribA\_KO\_Rp* primers containing 36 nucleotides flanking sequence of *ribA* gene. *E. coli*

36 CC101  $\Delta mutT$ / pKD46 was grown at 30 °C in the presence of 0.2% arabinose and processed at

37 O.D. 0.6 for electrocompetent cell preparation. Cells were electroporated with ~300ng of linear

38 fragment at 1.8 kV, 200  $\Omega$  and 25  $\mu$ F in a 0.1 cm cuvette, incubated for recovery at 37 °C in the

39 LB medium supplemented with 0.25 mg/ml riboflavin and selected for the knockouts on LB Cm  
40 plate containing 0.25 mg/ml riboflavin. Knockouts were verified by PCR amplification of *ribA*  
41 locus using flanking primers (*Eco\_ribA\_Up* and *Eco\_ribA\_Dn*) and internal primers  
42 (*Eco\_ribA\_IN\_Fp* and *Eco\_ribA\_IN\_Rp*).

### 43 **Supplementary References**

- 44 1. Cherepanov PP, Wackernagel W. 1995. Gene disruption in Escherichia coli: Tc<sup>R</sup> and Km<sup>R</sup>  
45 cassettes with the option of Flp-catalyzed excision of the antibiotic-resistance determinant.  
46 Gene 158:9-14. PMID: 7789817
- 47 2. Datsenko KA, Wanner BL. 2000. One-step inactivation of chromosomal genes in Escherichia  
48 coli K-12 using PCR products. Proc Natl Acad Sci U S A. 97:6640-6645. PMID: 10829079

49 **Table S1. List of DNA oligomers used in the study.**

| <b>DNA oligomer</b>          | <b>Sequence (5' to 3'), restriction site is underlined</b>   |
|------------------------------|--------------------------------------------------------------|
| <i>Eco_ndk_NcoI_Fp</i>       | TGTAAC <u>CCATGG</u> CTATTGAACG                              |
| <i>Eco_ndk_BglII_Rp</i>      | AAA <u>AGATCT</u> ACGGGTGCGCGG                               |
| <i>Eco_ndk_BglII_Rp_stop</i> | ATT <u>AGATCT</u> TTAACGGGTGCGCG                             |
| <i>Eco_ndk_KO_Fp</i>         | ATGGATGACGTGGGGCAAATCG                                       |
| <i>Eco_ndk_KO_Rp</i>         | CAGGTGTGACTAATTGTTTCAGACATATGCTATTC                          |
| <i>Eco_mutT_KO_Up</i>        | TACAAGCAGTGCCATGGCCCCTG                                      |
| <i>Eco_mutT_KO_Dn</i>        | GATGCGGCGAAAACGCCTTATCTG                                     |
| <i>Eco_ribA_KO_Fp</i>        | TAAACGTGTGGCAGAAGCCAAACTGCCAACCCCATGTGT<br>AGGCTGGAGCTGCTTCG |
| <i>Eco_ribA_KO_Rp</i>        | TTATTTGTTTCAGCAAATGGCCATTTTCTCGGCTTTCCAT<br>ATGAATATCCTCCTTA |
| <i>Eco_ribA_Up</i>           | TGTGCCATTCCGTGAACGAT                                         |
| <i>Eco_ribA_Dn</i>           | GCTTGCCGGTTATTTTGCTT                                         |
| <i>Eco_ribA_IN_Fp</i>        | TGACGCCCTGTTTCAGCTTGC                                        |
| <i>Eco_ribA_IN_Rp</i>        | CATTGACGCCAAGGAGTTTG                                         |

51 **Table S2: Mutation frequency (Rif<sup>r</sup>) values and analysis for Fig. 3.**

| MG1655 $\Delta mutT$        |           |                          |                         |
|-----------------------------|-----------|--------------------------|-------------------------|
|                             | pBAD      | pBAD_<br><i>Eco_mutT</i> | pBAD_<br><i>Eco_ndk</i> |
| 1.                          | 4.31e-005 | 1.50e-006                | 1.89e-004               |
| 2.                          | 3.80e-005 | 1.08e-006                | 1.47e-004               |
| 3.                          | 1.77e-005 | 7.63e-007                | 1.10e-004               |
| 4.                          | 1.21e-005 | 5.88e-007                | 1.00e-004               |
| Analysis (95% CI of median) |           |                          |                         |
| Actual confidence level     | 100%      | 100%                     | 100%                    |
| Lower confidence limit      | 1.21e-005 | 5.88e-007                | 1.00e-004               |
| Median                      | 2.78e-005 | 9.21e-007                | 1.28e-004               |
| Upper confidence limit      | 4.31e-005 | 1.50e-006                | 1.89e-004               |

52

53 **Table S3: Mutation frequency (A to C) values and analysis for Fig. 4.**

| CC101 $\Delta mutT$         |            |                          |                         |
|-----------------------------|------------|--------------------------|-------------------------|
|                             | pBAD       | pBAD_<br><i>Eco_mutT</i> | pBAD_<br><i>Eco_ndk</i> |
| 1.                          | 8.91e-006  | 2.38e-008                | 8.33e-006               |
| 2.                          | 7.54e-006  | 0.00e+000                | 8.00e-006               |
| 3.                          | 5.94e-006  | 0.00e+000                | 7.25e-006               |
| 4.                          | 5.70e-006  | 0.00e+000                | 6.05e-006               |
| 5.                          | 5.26e-006  | 0.00e+000                | 5.71e-006               |
| 6.                          | 5.16e-006  | 0.00e+000                | 5.69e-006               |
| 7.                          | 4.20e-006  | 0.00e+000                | 5.09e-006               |
| 8.                          | 4.07e-006  | 0.00e+000                | 4.62e-006               |
| 9.                          | 3.29e-006  | 0.00e+000                | 4.58e-006               |
| 10.                         | 2.12e-006  | 0.00e+000                | 3.16e-006               |
| Analysis (95% CI of median) |            |                          |                         |
| Actual confidence level     | 97.85%     | 97.85%                   | 97.85%                  |
| Lower confidence limit      | 3.290e-006 | 0.0                      | 4.580e-006              |
| Median                      | 5.210e-006 | 0.0                      | 5.70e-06                |
| Upper confidence limit      | 7.540e-006 | 0.0                      | 8.000e-006              |

**Table S4: Lac<sup>+</sup> reversion frequency values and analysis for Figs. 5A and B.**

|                             | Experiment 1          |                            | Experiment 2          |                            |
|-----------------------------|-----------------------|----------------------------|-----------------------|----------------------------|
|                             | CC101<br><i>ΔmutT</i> | CC101<br><i>ΔmutT Δndk</i> | CC101<br><i>ΔmutT</i> | CC101<br><i>ΔmutT Δndk</i> |
| 1.                          | 8.46e-006             | 2.11e-006                  | 2.25e-005             | 4.93e-006                  |
| 2.                          | 7.63e-006             | 2.00e-006                  | 1.67e-005             | 4.64e-006                  |
| 3.                          | 6.86e-006             | 1.26e-006                  | 8.89e-006             | 4.59e-006                  |
| 4.                          | 6.84e-006             | 1.13e-006                  | 7.50e-006             | 3.60e-006                  |
| 5.                          | 3.46e-006             | 1.03e-006                  | 6.23e-006             | 2.81e-006                  |
| 6.                          | 3.37e-006             | 9.82e-007                  | 6.15e-006             | 2.09e-006                  |
| 7.                          | 2.86e-006             | 9.34e-007                  | 6.14e-006             | 1.87e-006                  |
| 8.                          | 2.79e-006             | 7.41e-007                  | 5.23e-006             | 1.77e-006                  |
| 9.                          | 2.77e-006             | 7.03e-007                  | 4.87e-006             | 1.71e-006                  |
| 10.                         | 2.13e-006             | 6.62e-007                  | 4.68e-006             | 1.19e-006                  |
| Analysis (95% CI of median) |                       |                            |                       |                            |
| Actual confidence level     | 97.85%                | 97.85%                     | 97.85%                | 97.85%                     |
| Lower confidence limit      | 2.77e-006             | 7.03e-007                  | 4.87e-006             | 1.71e-006                  |
| Median                      | 3.41e-006             | 1.00e-006                  | 6.19e-006             | 2.45e-006                  |
| Upper confidence limit      | 7.63e-006             | 2.00e-006                  | 1.67e-005             | 4.64e-006                  |

57 **Table S5: Lac<sup>+</sup> reversion frequency values and analysis for Figs. 6A and B.**

|                             | Experiment 1                |                                            | Experiment 2                |                                            |
|-----------------------------|-----------------------------|--------------------------------------------|-----------------------------|--------------------------------------------|
|                             | CC101<br><i>ΔmutT ΔribA</i> | CC101<br><i>ΔmutT ΔribA</i><br><i>Δndk</i> | CC101<br><i>ΔmutT ΔribA</i> | CC101<br><i>ΔmutT ΔribA</i><br><i>Δndk</i> |
| 1.                          | 5.17e-005                   | 6.50e-006                                  | 3.66e-005                   | 6.96e-006                                  |
| 2.                          | 4.67e-005                   | 5.44e-006                                  | 3.65e-005                   | 6.78e-006                                  |
| 3.                          | 3.65e-005                   | 5.38e-006                                  | 2.24e-005                   | 3.96e-006                                  |
| 4.                          | 3.21e-005                   | 5.19e-006                                  | 1.81e-005                   | 3.96e-006                                  |
| 5.                          | 3.09e-005                   | 4.60e-006                                  | 1.39e-005                   | 3.92e-006                                  |
| 6.                          | 1.85e-005                   | 3.39e-006                                  | 1.28e-005                   | 3.55e-006                                  |
| 7.                          | 1.57e-005                   | 3.30e-006                                  | 1.08e-005                   | 3.32e-006                                  |
| 8.                          | 1.20e-005                   | 2.84e-006                                  | 7.46e-006                   | 2.88e-006                                  |
| 9.                          | 8.15e-006                   | 2.68e-006                                  | 7.38e-006                   | 2.86e-006                                  |
| 10.                         | 7.41e-006                   | 2.66e-006                                  | 3.95e-006                   | 1.52e-006                                  |
| 11.                         | 4.37e-006                   | 2.12e-006                                  |                             |                                            |
| Analysis (95% CI of median) |                             |                                            |                             |                                            |
| Actual confidence level     | 98.83%                      | 98.83%                                     | 97.85%                      | 97.85%                                     |
| Lower confidence limit      | 7.41e-006                   | 2.66e-006                                  | 7.38e-006                   | 2.86e-006                                  |
| Median                      | 1.85e-005                   | 3.39e-006                                  | 1.33e-005                   | 3.73e-006                                  |
| Upper confidence limit      | 4.67e-005                   | 5.44e-006                                  | 3.65e-005                   | 6.78e-006                                  |



59 **Table S6: Lac<sup>+</sup> reversion rates and analysis for Fig. 6C.**

|                             | CC101<br><i>ΔmutT ΔribA</i> | CC101<br><i>ΔmutT ΔribA<br/>Δndk</i> |
|-----------------------------|-----------------------------|--------------------------------------|
| 1.                          | 1.00e-006                   | 4.13e-007                            |
| 2.                          | 8.44e-007                   | 2.56e-007                            |
| 3.                          | 7.24e-007                   | 2.36e-007                            |
| 4.                          | 6.36e-007                   | 1.82e-007                            |
| 5.                          | 5.04e-007                   | 1.57e-007                            |
| 6.                          | 4.32e-007                   | 1.41e-007                            |
| 7.                          | 3.89e-007                   | 1.40e-007                            |
| 8.                          | 3.55e-007                   | 1.17e-007                            |
| 9.                          | 3.43e-007                   | 9.63e-008                            |
| 10.                         | 3.32e-007                   | 8.73e-008                            |
| 11.                         | 2.43e-007                   | 3.83e-008                            |
| Analysis (95% CI of median) |                             |                                      |
| Actual confidence level     | 98.83%                      | 98.83%                               |
| Lower confidence limit      | 3.32e-007                   | 8.73e-008                            |
| Median                      | 4.32e-007                   | 1.41e-007                            |
| Upper confidence limit      | 8.44e-007                   | 2.56e-007                            |

Figure S1

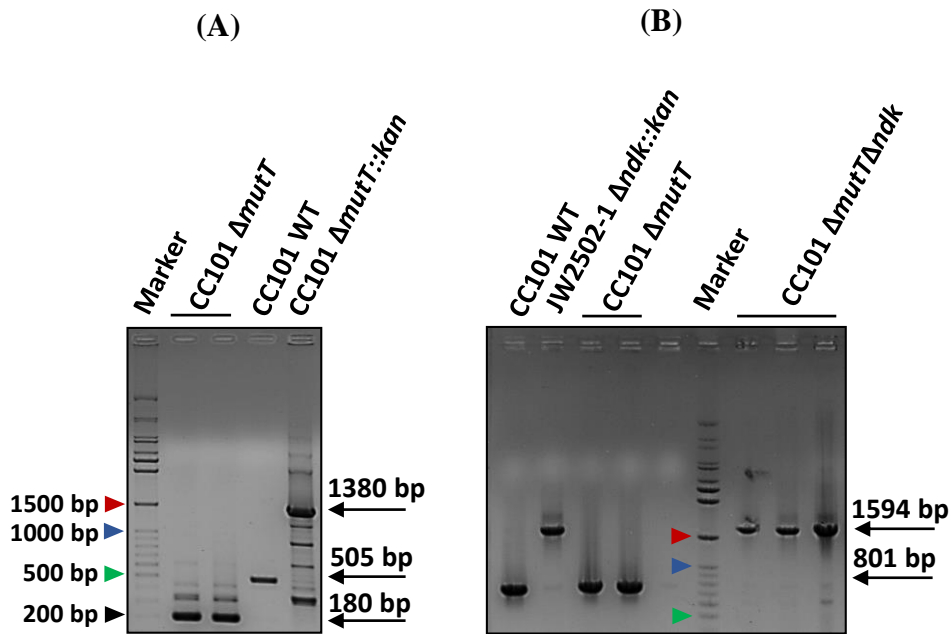

**Fig. S1: Verification of *ndk* deletion in CC101  $\Delta$ *mutT* strain.** (A) Unmarked deletion of *mutT* gene was confirmed by the amplification of *mutT* locus, using the flanking primers, which amplifies 180 bp DNA from the CC101 $\Delta$ *mutT* strain as opposed to the 1380 bp DNA from the parent ( $\Delta$ *mutT::kan*) strain. (B) Deletion of *ndk* by transducing  $\Delta$ *ndk::kan* allele in CC101  $\Delta$ *mutT* strain was verified by the amplification of *ndk* locus, using the flanking primers, where the wild type and *ndk::kan* alleles resulted in 801 bp and 1594 bp long amplicons, respectively.

Figure S2

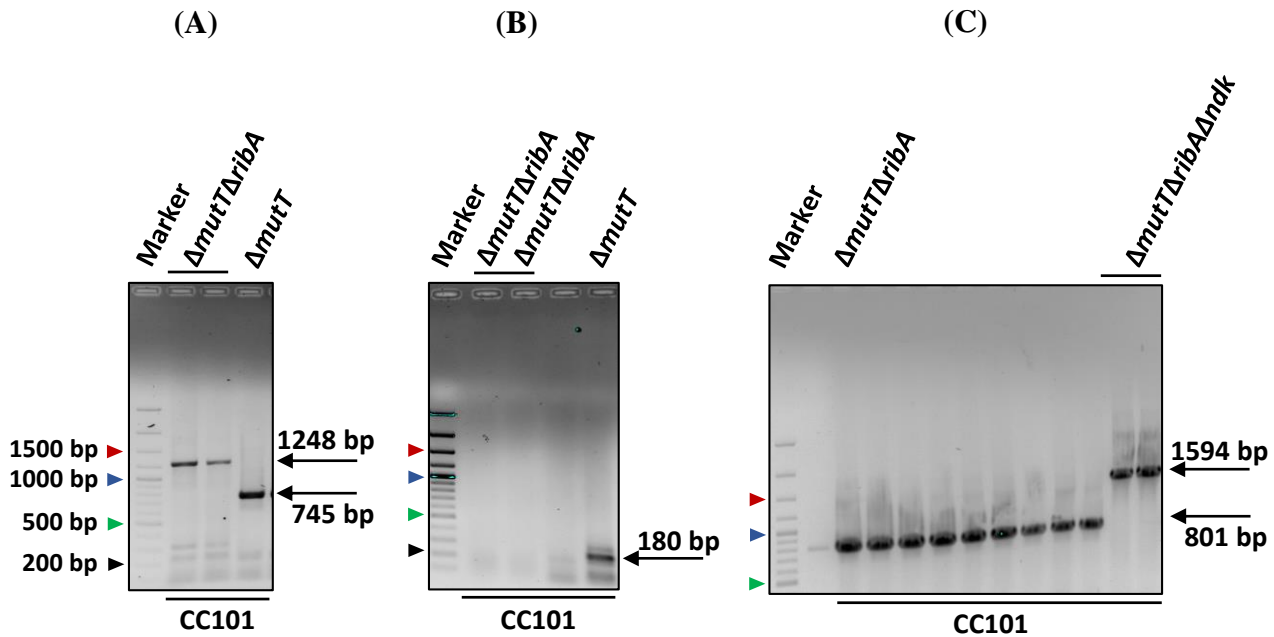

**Fig. S2: Validation of CC101  $\Delta mutT\Delta ribA$  and CC101  $\Delta mutT\Delta ribA\Delta ndk$  strains.** Disruption of *ribA* gene was checked by the amplification of the locus, (A) using the flanking primers (amplifies 1248 bp and 745 bp amplicons from the knockout and the parent strains, respectively), (B) using the internal primers (results in no amplification versus an amplicon of 180 bp from the knockout and the parent strains, respectively). (C) Deletion of *ndk* gene in CC101  $\Delta mutT\Delta ribA$  strain was examined by the amplification of *ndk* locus, using the flanking primers (801 and 1594 bp long amplicons for the wild type and *ndk::kan* alleles resulted in 801 bp and 1594 bp long amplicons for the wild type and *ndk::kan* alleles, respectively).
